# Supplementary material for: Bombus terrestris Prefer Mixed-Pollen Diets for a Better Colony Performance: A Laboratory Study
Source: MDPI journal article supplement (doi:10.3390/insects15040285), 2024-04-17
Supplement: s1 [file s1]

Supplementary Materials for  
***Bombus terrestris* Prefer Mixed-Pollen Diets for a Better Colony**  
**Performance: A Laboratory Study**

Ziyu Zhou, Hong Zhang, Shibonage K. Mashilingi, Chunting Jie, Baodi Guo, Yi

Guo, Xiao Hu, Shahid Iqbal, Bingshuai Wei,

Yanjie Liu, and Jiandong An

Corresponding authors: liuyanjie@caas.cn (Y.L.); anjiandong@caas.cn (J.A.)

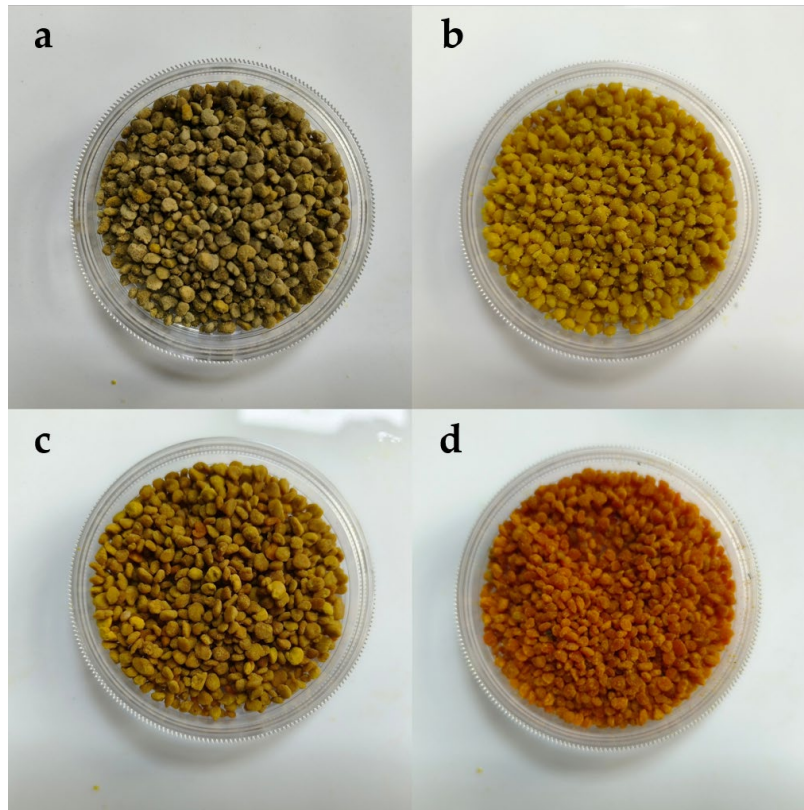

**Figure S1.** The four pollens used in this study. (a) Wild apricot pollen; (b) oilseed rape pollen; (c) buckwheat pollen; (d) sunflower pollen.

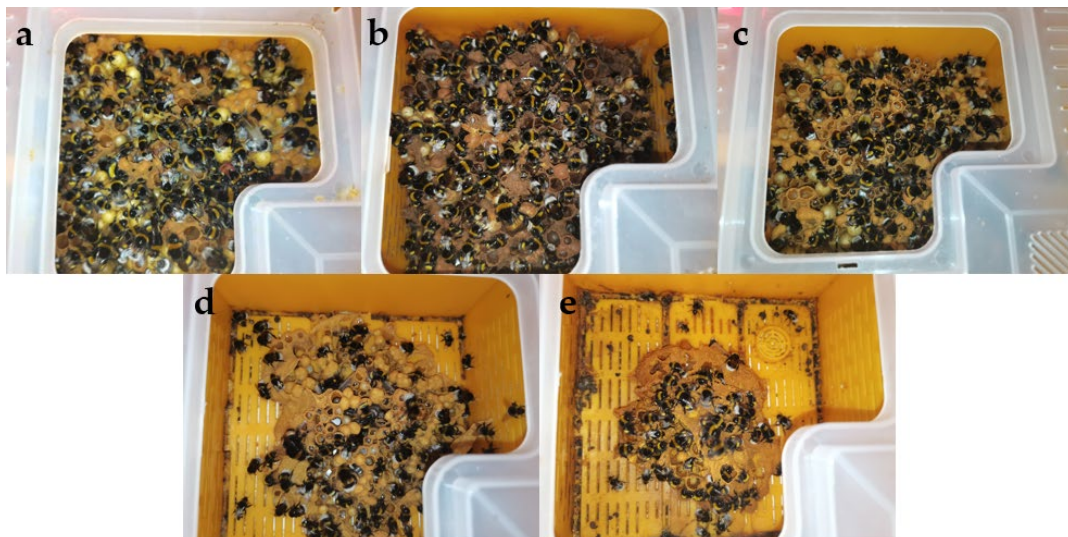

**Figure S2.** The colony sizes of bumblebees fed the different pollen diets. (a) The mixed four-pollen diet; (b) wild apricot pollen diet; (c) oilseed rape pollen diet; (d) buckwheat pollen diet; (e) sunflower pollen diet.

**Table S1.** The location sites of the four pollen species collected in this study.

| Sites | Wild apricot     | Oilseed rape     | Buckwheat              | Sunflower              |
|-------|------------------|------------------|------------------------|------------------------|
| 1     | Yanqing, Beijing | Huangmei, Hubei  | Jingbian, Shaanxi      | Guyang, Inner Mongolia |
| 2     | Miyun, Beijing   | Hukou, Jiangxi   | Zizhou, Shaanxi        | Wuyuan, Inner Mongolia |
| 3     | Xinglong, Hebei  | Wangjiang, Anhui | Wuyuan, Inner Mongolia | Suide, Shaanxi         |
